# Supplementary material for: Alterations in Retinal Microvascular Geometry in Young Type 1 Diabetes
Source: PubMed Central journal article supplement — Diabetes Care. 2010 Mar 18;33(6):1331–6. doi: 10.2337/dc10-0055 (PMC2875449; doi:10.2337/dc10-0055), 2010-03-18
Supplement: supp_dc10-0055_olineappendix.pdf [file supp_dc10-0055_olineappendix.pdf]

## ONLINE APPENDIX

### Alterations in Retinal Microvascular Geometry in Young Type 1 Diabetes

Sasongko et al.

**Supplemental Table 1.** Baseline characteristics, according to the gradability of retinal photograph

| Characteristics             | Gradable<br>N = 944 | Ungradable<br>N = 215 | P-value |
|-----------------------------|---------------------|-----------------------|---------|
| Sex, % male                 | 47.0                | 42.8                  | 0.260   |
| Pubertal stage, %           |                     |                       |         |
| 1                           | 5.4                 | 4.6                   | 0.450   |
| 2                           | 11.9                | 13.8                  |         |
| 3                           | 16.1                | 10.9                  |         |
| 4                           | 25.4                | 28.7                  |         |
| 5                           | 41.1                | 42.0                  |         |
|                             | Mean (SE)           |                       |         |
| Age, years                  | 14.1 (0.05)         | 13.9 (0.10)           | 0.023   |
| BMI, kg/m <sup>2</sup>      | 21.9 (0.11)         | 21.8 (0.23)           | 0.902   |
| Systolic BP, mmHg           | 111.89 (0.38)       | 113.5 (0.79)          | 0.052   |
| Diastolic BP, mmHg          | 67.4 (0.26)         | 67.9 (0.55)           | 0.370   |
| Mean arterial BP, mmHg      | 82.2 (0.26)         | 83.1 (0.55)           | 0.128   |
| Cholesterol, mmol/L         | 4.4 (0.03)          | 4.4 (0.06)            | 0.327   |
| Duration of diabetes, years | 6.2 (0.11)          | 5.6 (0.22)            | 0.026   |
| HbA1c, %                    | 8.5 (0.04)          | 8.5 (0.09)            | 0.944   |

N = Number at risk; Data are age-adjusted means (Standard Error (SE)), except for age and %.

**Supplemental Table 2.** Associations of retinal arteriolar parameters with baseline characteristics.

| Characteristics        |                                     | N   | Curvature tortuosity<br>( $\times 10^3$ ) | Branching angle     | Optimality deviation<br>( $\times 10^2$ ) | Length to Diameter<br>Ratio |                      |
|------------------------|-------------------------------------|-----|-------------------------------------------|---------------------|-------------------------------------------|-----------------------------|----------------------|
| Age, years             | 12 – 14                             | 640 | 34.9 (34.0, 35.8)                         | 83.7 (82.8, 84.5)   | 72.0 (70.6, 73.4)                         | 71.8 (65.9, 78.3)           |                      |
|                        | 14 – 20                             | 519 | 33.4 (32.4, 34.4)                         | 83.7 (82.8, 84.7)   | 71.8 (70.2, 73.4)                         | 71.2 (64.9, 78.0)           |                      |
|                        | P-value                             |     | 0.028                                     | 0.917               | 0.870                                     | 0.888                       |                      |
|                        | Per SD increase*                    |     | -0.73 (-1.37, -0.10)                      | 0.21 (-0.41, 0.83)  | 0.09 (-0.95, 1.13)                        | -1.87 (-7.90, 4.17)         |                      |
| Sex                    | Female                              | 623 | 34.3 (33.4, 35.2)                         | 84.4 (83.5, 85.2)   | 71.8 (70.3, 73.2)                         | 72.6 (66.6, 79.1)           |                      |
|                        | Male                                | 536 | 34.2 (33.3, 35.2)                         | 83.0 (82.0, 83.9)   | 72.1 (70.5, 73.6)                         | 70.6 (64.4, 77.3)           |                      |
|                        | P-value                             |     | 0.941                                     | 0.033               | 0.762                                     | 0.665                       |                      |
| Pubertal stage         | Stage 1                             | 47  | 34.4 (30.1, 37.9)                         | 82.5 (79.2, 85.9)   | 72.5 (66.7, 78.2)                         | 68.4 (52.0, 97.6)           |                      |
|                        | Stage 2                             | 110 | 36.4 (34.0, 38.7)                         | 84.1 (81.8, 86.4)   | 70.5 (66.5, 74.4)                         | 72.4 (57.6, 91.0)           |                      |
|                        | Stage 3                             | 135 | 35.3 (33.3, 37.2)                         | 84.6 (82.7, 86.5)   | 72.1 (68.8, 75.3)                         | 70.9 (58.9, 85.5)           |                      |
|                        | Stage 4                             | 233 | 35.2 (33.7, 36.7)                         | 83.9 (82.4, 85.4)   | 73.0 (70.4, 75.5)                         | 67.0 (58.3, 77.1)           |                      |
|                        | Stage 5                             | 369 | 33.4 (32.0, 34.8)                         | 83.2 (81.8, 84.5)   | 72.5 (70.2, 74.8)                         | 66.7 (58.6, 76.0)           |                      |
|                        | P for trend                         |     |                                           | 0.252               | 0.728                                     | 0.885                       | 0.971                |
| BMI, kg/m <sup>2</sup> | ≤18.0                               | 121 | 36.0 (33.9, 38.0)                         | 84.2 (82.2, 86.2)   | 72.8 (69.5, 76.1)                         | 73.9 (60.5, 90.3)           |                      |
|                        | 18.1 – 21.0                         | 410 | 33.5 (32.4, 34.7)                         | 84.1 (83.0, 85.2)   | 71.9 (70.0, 73.7)                         | 76.3 (68.5, 85.1)           |                      |
|                        | 21.1 – 25.0                         | 436 | 34.4 (33.3, 35.5)                         | 83.6 (82.5, 84.6)   | 71.5 (69.8, 73.3)                         | 67.2 (60.6, 74.5)           |                      |
|                        | ≥ 25.1                              | 192 | 34.3 (32.7, 35.9)                         | 83.0 (81.4, 84.5)   | 72.2 (69.6, 74.9)                         | 71.3 (61.1, 83.2)           |                      |
|                        | P for trend                         |     |                                           | 0.216               | 0.236                                     | 0.910                       | 0.422                |
|                        | Per SD increase*                    |     |                                           | -0.07 (-0.77, 0.40) | -0.37 (-1.06, 0.31)                       | 0.18 (-1.33, 0.96)          | -2.55 (-9.58, 4.48)  |
| SBP, mmHg              | ≤ 120                               | 798 | 34.4 (33.7, 35.1)                         | 83.9 (83.2, 84.6)   | 72.2 (71.0, 73.3)                         | 73.9 (69.1, 79.1)           |                      |
|                        | > 120                               | 146 | 33.5 (31.8)                               | 82.8 (81.2, 84.5)   | 70.4 (67.7, 73.2)                         | 59.3 (50.2, 70.2)           |                      |
|                        | P-value                             |     | 0.321                                     | 0.266               | 0.257                                     | 0.018                       |                      |
|                        | Per SD increase*                    |     | -0.29 (-0.95, 0.40)                       | -0.14 (-0.80, 0.52) | 0.26 (-0.85, 1.36)                        | -10.0 (-16.3, -3.69)        |                      |
| DBP, mmHg              | ≤ 60.0                              |     | 34.1 (33.0, 35.3)                         | 83.9 (82.8, 84.9)   | 70.6 (68.7, 72.5)                         | 77.1 (68.7, 85.6)           |                      |
|                        | 60.1 – 80.0                         |     | 34.3 (33.5, 35.1)                         | 83.8 (83.0, 84.6)   | 72.5 (71.1, 73.8)                         | 70.1 (64.7, 75.9)           |                      |
|                        | ≥ 80.0                              |     | 34.1 (30.9, 37.4)                         | 81.4 (78.2, 84.5)   | 73.7 (69.4, 78.9)                         | 56.2 (40.0, 78.3)           |                      |
|                        | P-value                             |     | 0.791                                     | 0.891               | 0.093                                     | 0.150                       |                      |
|                        | Per SD increase*                    |     |                                           | 0.02 (-0.65, 0.69)  | -0.14 (-0.80, 0.51)                       | 0.96 (-0.14, 2.05)          | -9.03 (-15.3, -2.70) |
| MABP, mmHg             | ≤ 86.7                              | 863 | 34.2 (33.5, 35.0)                         | 83.8 (83.1, 84.6)   | 72.0 (70.8, 73.3)                         | 76.4 (71.1, 82.1)           |                      |
|                        | ≥ 86.8                              | 296 | 34.3 (33.0, 35.6)                         | 83.4 (82.1, 84.7)   | 71.6 (69.4, 73.7)                         | 58.2 (51.1, 66.2)           |                      |
|                        | P-value                             |     | 0.424                                     | 0.582               | 0.725                                     | <0.0001                     |                      |
|                        | Per SD increase*                    |     | -0.12 (-0.80, 0.56)                       | -0.16 (-0.83, 0.50) | 0.77 (-0.34, 1.89)                        | -10.8 (-17.13, -4.44)       |                      |
| Cholesterol,<br>mmol/L | 1 <sup>st</sup> Quartile, ≤ 3.7     | 280 | 33.7 (32.4, 35.1)                         | 83.2 (81.8, 84.5)   | 72.4 (70.2, 74.6)                         | 66.3 (58.2, 75.6)           |                      |
|                        | 2 <sup>nd</sup> Quartile, 3.8 – 4.3 | 319 | 34.1 (32.9, 35.3)                         | 83.7 (82.5, 84.9)   | 71.1 (69.1, 73.1)                         | 68.9 (61.3, 77.5)           |                      |

|                 |                                     |     |                     |                     |                    |                     |
|-----------------|-------------------------------------|-----|---------------------|---------------------|--------------------|---------------------|
|                 | 3 <sup>rd</sup> Quartile, 4.4 – 4.8 | 244 | 35.7 (34.3, 37.1)   | 84.6 (83.2, 86.0)   | 72.4 (70.0, 74.7)  | 71.5 (62.6, 81.7)   |
|                 | 4 <sup>th</sup> Quartile, ≥ 4.9     | 266 | 33.5 (32.1, 34.9)   | 83.9 (82.6, 85.3)   | 72.7 (70.3, 75.0)  | 78.7 (68.8, 90.1)   |
|                 | P for trend                         |     | 0.121               | 0.515               | 0.735              | 0.070               |
|                 | Per SD increase*                    |     | -0.02 (-0.70, 0.66) | 0.44 (-0.20, 1.09)  | 0.36 (-0.77, 1.49) | 3.58 (-2.12, 9.30)  |
| Duration, years | ≤ 5.0                               | 522 | 33.7 (32.7, 34.7)   | 82.8 (81.8, 83.7)   | 71.0 (69.4, 72.7)  | 72.0 (65.4, 79.1)   |
|                 | 5.1 – 10.0                          | 455 | 34.9 (33.8, 35.9)   | 83.8 (82.8, 84.9)   | 71.8 (70.1, 73.5)  | 72.1 (65.2, 79.7)   |
|                 | ≥ 10.1                              | 182 | 34.3 (32.6, 35.9)   | 85.9 (84.4, 87.5)   | 75.6 (71.9, 77.2)  | 69.7 (59.7, 81.4)   |
|                 | P for trend                         |     | 0.278               | 0.001               | 0.041              | 0.930               |
|                 | Per SD increase*                    |     | 0.49 (-0.16, 1.14)  | 1.15 (0.52, 1.78)   | 1.29 (0.22, 2.35)  | -0.46 (-6.62, 5.69) |
| HbA1c, %        | ≤ 8.5                               | 605 | 33.4 (32.5, 34.3)   | 83.5 (82.6, 84.4)   | 71.4 (69.9, 72.9)  | 71.6 (65.5, 78.2)   |
|                 | > 8.5                               | 554 | 35.1 (34.2, 36.1)   | 83.9 (83.0, 84.8)   | 72.4 (70.9, 73.9)  | 71.7 (65.6, 78.4)   |
|                 | P-value                             |     | 0.008               | 0.951               | 0.373              | 0.977               |
|                 | Per SD increase*                    |     | 0.34 (-0.35, 1.03)  | -0.08 (-0.76, 0.60) | 1.05 (-0.07, 2.18) | -0.71 (-7.63, 6.21) |

Data are age and gender-adjusted means (95% Confidence Intervals), except for rows with\*

\*Age- and gender- adjusted beta coefficient, obtained from linear regression models. SD for age (1.5 years), BMI (3.5 kg/m<sup>2</sup>), SBP (12 mmHg), MABP (8.5 mmHg), cholesterol (0.9 mmol/L), duration of diabetes (3.3 years), and HbA1c (1.3%)

**Supplemental Table 3.** Associations of retinal venular parameters with baseline characteristics.

| Characteristics        |                                 | N   | Curvature tortuosity<br>(x10 <sup>3</sup> ) | Branching angle      | Optimality deviation<br>(x10 <sup>2</sup> ) | Length to Diameter<br>Ratio |
|------------------------|---------------------------------|-----|---------------------------------------------|----------------------|---------------------------------------------|-----------------------------|
| Age, years             | 12 – 14                         | 640 | 31.9 (31.0, 32.8)                           | 79.2 (78.3, 80.2)    | 61.8 (60.3, 63.3)                           | 80.6 (74.1, 87.6)           |
|                        | 14 – 20                         | 519 | 30.3 (29.2, 31.2)                           | 79.56 (78.5, 80.6)   | 64.3 (62.7, 66.0)                           | 74.3 (67.9, 81.2)           |
|                        | P-value                         |     | 0.016                                       | 0.635                | 0.027                                       | 0.189                       |
|                        | Per SD increase*                |     | -0.90 (-1.54, -0.26)                        | 0.28 (-0.41, 0.97)   | 0.40 (-1.32, 2.12)                          | -2.36 (-8.26, 3.53)         |
| Sex                    | Female                          | 623 | 31.1 (30.2, 32.0)                           | 79.6 (78.6, 80.6)    | 63.0 (61.5, 64.5)                           | 77.8 (71.5, 84.5)           |
|                        | Male                            | 536 | 31.2 (30.3, 32.2)                           | 79.1 (78.1, 80.1)    | 62.9 (61.3, 64.5)                           | 77.6 (71.0, 84.9)           |
|                        | P-value                         |     | 0.857                                       | 0.499                | 0.932                                       | 0.975                       |
| Pubertal stage         | Stage 1                         | 47  | 31.9 (28.4, 35.4)                           | 80.4 (76.6, 84.3)    | 58.8 (53.5, 64.7)                           | 72.5 (52.9, 99.3)           |
|                        | Stage 2                         | 110 | 32.0 (29.7, 34.4)                           | 79.9 (77.3, 82.6)    | 62.9 (58.1, 66.1)                           | 70.8 (56.3, 89.1)           |
|                        | Stage 3                         | 135 | 32.8 (30.8, 34.8)                           | 79.9 (77.7, 82.1)    | 60.9 (57.8, 64.3)                           | 74.8 (62.2, 89.9)           |
|                        | Stage 4                         | 233 | 30.7 (29.2, 32.2)                           | 79.2 (77.5, 80.9)    | 61.3 (58.8, 63.9)                           | 75.0 (65.2, 86.5)           |
|                        | Stage 5                         | 369 | 30.5 (29.1, 31.9)                           | 79.1 (77.6, 80.7)    | 65.5 (63.1, 68.0)                           | 76.5 (67.2, 87.2)           |
|                        | P for trend                     |     | 0.435                                       | 0.960                | 0.103                                       | 0.989                       |
| BMI, kg/m <sup>2</sup> | ≤18.0                           | 121 | 30.7 (28.7, 32.8)                           | 80.7 (78.5, 82.9)    | 61.3 (58.0, 64.8)                           | 74.2 (61.1, 90.0)           |
|                        | 18.1 – 21.0                     | 410 | 31.6 (30.5, 32.8)                           | 80.0 (78.8, 81.2)    | 63.8 (61.9, 65.8)                           | 79.0 (69.1, 87.7)           |
|                        | 21.1 – 25.0                     | 436 | 31.0 (29.9, 32.0)                           | 78.9 (77.7, 80.0)    | 62.4 (60.6, 64.2)                           | 76.3 (69.0, 84.4)           |
|                        | ≥ 25.1                          | 192 | 31.0 (29.3, 32.6)                           | 78.3 (76.6, 80.0)    | 63.4 (60.7, 66.2)                           | 80.6 (69.3, 93.7)           |
|                        | P for trend                     |     | 0.803                                       | 0.227                | 0.521                                       | 0.878                       |
|                        | Per SD increase*                |     | 0.13 (-0.57, 0.84)                          | -0.58 (-1.24, 0.09)  | 0.45 (-1.46, 2.36)                          | 3.47 (-3.40, 10.34)         |
| SBP, mmHg              | ≤ 120                           |     | 31.3 (30.6, 32.0)                           | 79.5 (78.8, 80.3)    | 63.1 (61.8, 64.1)                           | 79.0 (74.4, 83.9)           |
|                        | > 120                           |     | 30.3 (28.6, 32.0)                           | 78.4 (76.5, 80.2)    | 63.0 (60.2, 66.0)                           | 68.7 (58.6, 81.5)           |
|                        | P-value                         |     | 0.283                                       | 0.251                | 0.927                                       | 0.128                       |
|                        | Per SD increase*                |     | -0.55 (-1.23, 0.12)                         | -0.26 (-0.91, 0.37)  | 0.17 (-1.67, 2.02)                          | -5.52 (-11.7, 0.65)         |
| DBP, mmHg              | ≤ 60.0                          |     | 31.9 (30.7, 33.0)                           | 80.4 (79.2, 81.6)    | 63.4 (61.3, 65.4)                           | 75.9 (68.7, 85.6)           |
|                        | 60.1 – 80.0                     |     | 30.9 (30.0, 31.7)                           | 78.9 (78.0, 79.8)    | 62.6 (61.3, 64.1)                           | 78.3 (73.0, 85.6)           |
|                        | ≥ 80.0                          |     | 29.3 (26.2, 32.6)                           | 78.8 (75.4, 82.3)    | 64.2 (58.8, 70.0)                           | 67.4 (49.4, 92.8)           |
|                        | P-value                         |     | 0.231                                       | 0.143                | 0.776                                       | 0.619                       |
|                        | Per SD increase*                |     | -0.51 (-1.18, 0.16)                         | -0.63 (-1.26, -0.00) | -0.25 (-2.06, 1.57)                         | -4.13 (-10.3, 2.06)         |
| MABP, mmHg             | ≤ 86.7                          | 863 | 31.5 (30.7, 32.2)                           | 80.1 (79.1, 81.2)    | 62.6 (61.4, 64.0)                           | 80.6 (75.2, 86.5)           |
|                        | ≥ 86.8                          | 296 | 30.2 (28.9, 31.6)                           | 78.8 (77.8, 79.7)    | 63.7 (61.5, 66.1)                           | 69.0 (60.8, 78.3)           |
|                        | P-value                         |     | 0.108                                       | 0.079                | 0.417                                       | 0.036                       |
|                        | Per SD increase*                |     | -0.61 (-1.29, 0.07)                         | -0.56 (-1.20, 0.08)  | 0.08 (-1.94, 1.76)                          | -5.37 (-11.58, 0.84)        |
| Cholesterol, mmol/L    | 1 <sup>st</sup> Quartile, ≤ 3.7 | 280 | 31.3 (30.0, 32.7)                           | 77.6 (76.1, 79.0)    | 64.3 (62.0, 66.7)                           | 74.5 (65.6, 84.6)           |

|                 |                                     |     |                      |                     |                      |                     |
|-----------------|-------------------------------------|-----|----------------------|---------------------|----------------------|---------------------|
|                 | 2 <sup>nd</sup> Quartile, 3.8 – 4.3 | 319 | 31.4 (30.1, 32.6)    | 79.7 (78.3, 81.0)   | 64.3 (62.2, 66.5)    | 71.8 (64.0, 80.5)   |
|                 | 3 <sup>rd</sup> Quartile, 4.4 – 4.8 | 244 | 32.3 (30.9, 33.7)    | 80.7 (79.1, 82.2)   | 62.6 (60.2, 65.0)    | 80.9 (71.2, 92.0)   |
|                 | 4 <sup>th</sup> Quartile, ≥ 4.9     | 266 | 29.9 (28.5, 31.3)    | 79.7 (78.2, 81.2)   | 61.4 (59.1, 63.7)    | 82.7 (72.6, 94.2)   |
|                 | P for trend                         |     | 0.116                | 0.033               | 0.221                | 0.331               |
|                 | Per SD increase*                    |     | -0.71 (-1.40, -0.02) | 0.44 (-0.20, 1.09)  | -1.90 (-3.75, -0.05) | 3.54 (-2.95, 10.03) |
| Duration, years | ≤ 5.0                               | 522 | 31.6 (30.6, 32.6)    | 79.7 (78.6, 80.7)   | 62.1 (60.5, 63.9)    | 81.2 (74.0, 89.2)   |
|                 | 5.1 – 10.0                          | 455 | 30.9 (29.9, 32.0)    | 79.2 (78.0, 80.3)   | 62.9 (61.2, 64.7)    | 76.4 (69.4, 76.7)   |
|                 | ≥ 10.1                              | 182 | 30.6 (29.0, 32.3)    | 79.1 (77.3, 80.8)   | 65.0 (62.2, 67.9)    | 72.0 (62.0, 83.6)   |
|                 | P for trend                         |     | 0.506                | 0.766               | 0.249                | 0.368               |
|                 | Per SD increase*                    |     | -0.22 (-0.88, 0.43)  | -0.26 (-0.88, 0.36) | 1.44 (-0.31, 3.19)   | -3.21 (-9.23, 2.82) |
| HbA1c, %        | ≤ 8.5                               | 605 | 31.2 (30.3, 32.2)    | 79.6 (78.6, 80.6)   | 62.7 (61.1, 64.2)    | 77.9 (71.5, 85.0)   |
|                 | > 8.5                               | 554 | 31.1 (30.2, 32.0)    | 79.6 (78.2, 80.2)   | 63.2 (61.6, 64.8)    | 77.4 (83.6, 84.4)   |
|                 | P-value                             |     | 0.848                | 0.5762              | 0.643                | 0.922               |
|                 | Per SD increase*                    |     | -0.190 (-0.88, 0.50) | -0.30 (-0.96, 0.35) | 0.09 (-1.79, 1.98)   | -0.17 (-6.82, 6.48) |

Data are age and gender-adjusted means (95% Confidence Intervals), except for rows with\*

\*Age- and gender- adjusted beta coefficient, obtained from linear regression models. SD for age (1.5 years), BMI (3.5 kg/m<sup>2</sup>), SBP (12 mmHg), MABP (8.5 mmHg), cholesterol (0.9 mmol/L), duration of diabetes (3.3 years), and HbA1c (1.3%)
